# Supplementary material for: Hierarchical length and sequence preferences establish a single major piRNA 3′-end
Source: PubMed Central journal article supplement — iScience. 2022 May 18;25(6):104427. doi: 10.1016/j.isci.2022.104427 (PMC9162947; doi:10.1016/j.isci.2022.104427), 2022-05-18
Supplement: mmc1.pdf [file mmc1.pdf]

iScience, Volume 25

## **Supplemental information**

### **Hierarchical length and sequence preferences establish a single major piRNA 3'-end**

**Daniel Stoyko, Pavol Genzor, and Astrid D. Haase**

**Supplemental Figures (S1-3)**  
**Stoyko et al.**

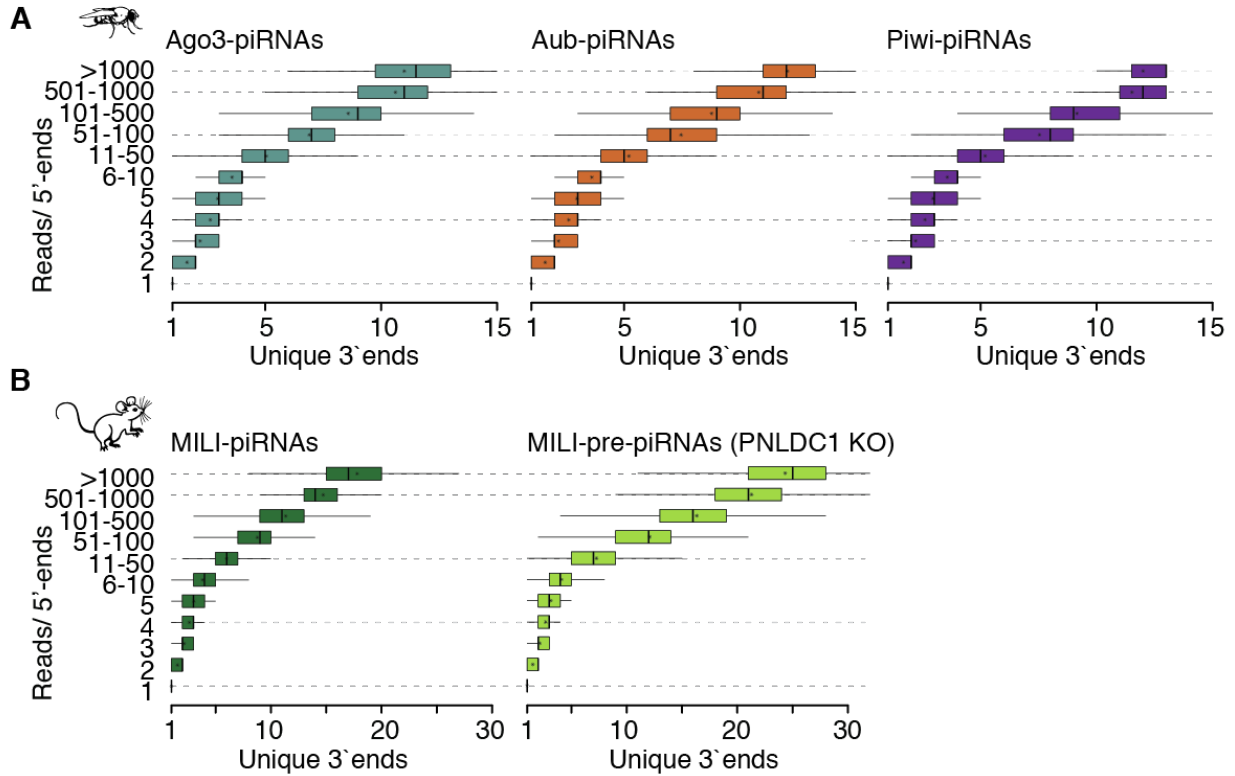

**Figure S1. Fly and mouse piRNAs have a many possible 3'-ends, related to Figure 1. (A)** *Drosophila* piRNAs with the same 5'-end have a number of different 3'-ends. Uniquely mapping piRNAs (18-32nt in length) were grouped by the number of reads sharing their respective 5'-ends. Number of unique 3'-ends observed per 5'-end is depicted for each group. **(B)** Both mature and untrimmed MILI-piRNAs can have several possible unique 3'-ends. (Uniquely mapping piRNAs were used.)

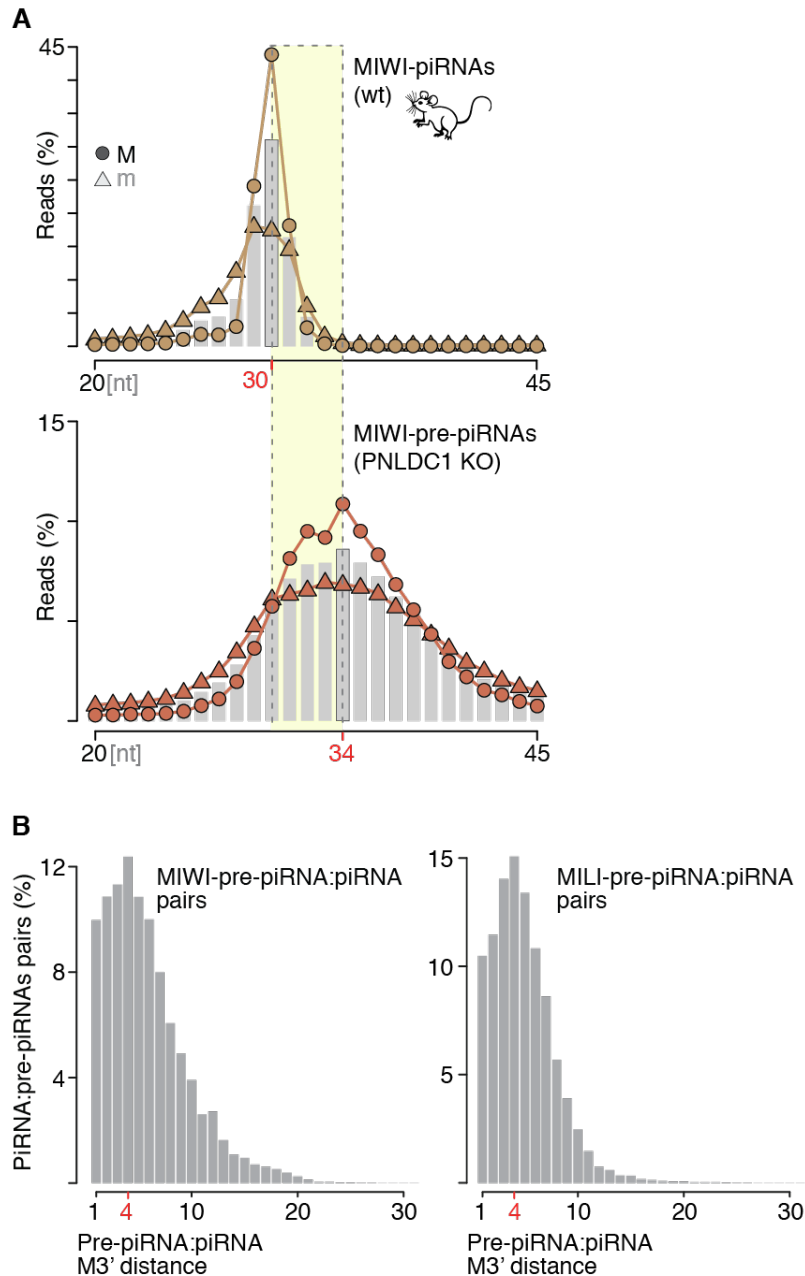

**Figure S2. Major 3'-ends of murine piRNAs have specific length preferences that are four nucleotides (4nt) apart, related to Figure 2. (A)** Both, trimmed and untrimmed MILI-piRNAs with major 3'-ends have distinct length preferences at 30nt and 34nt respectively. The length distribution of major (M) and all minor (m) 3'-ends is normalized to the respective group. Bar plot depicts length distribution of the entire library. **(B)** Untrimmed murine piRNAs are preferentially 4nt longer than their mature counterparts. Untrimmed-piRNAs were paired with trimmed-piRNAs that have the same 5'-end. The distance between the major 3'-ends of the pair was calculated and scaled by the number of piRNAs in the pair.

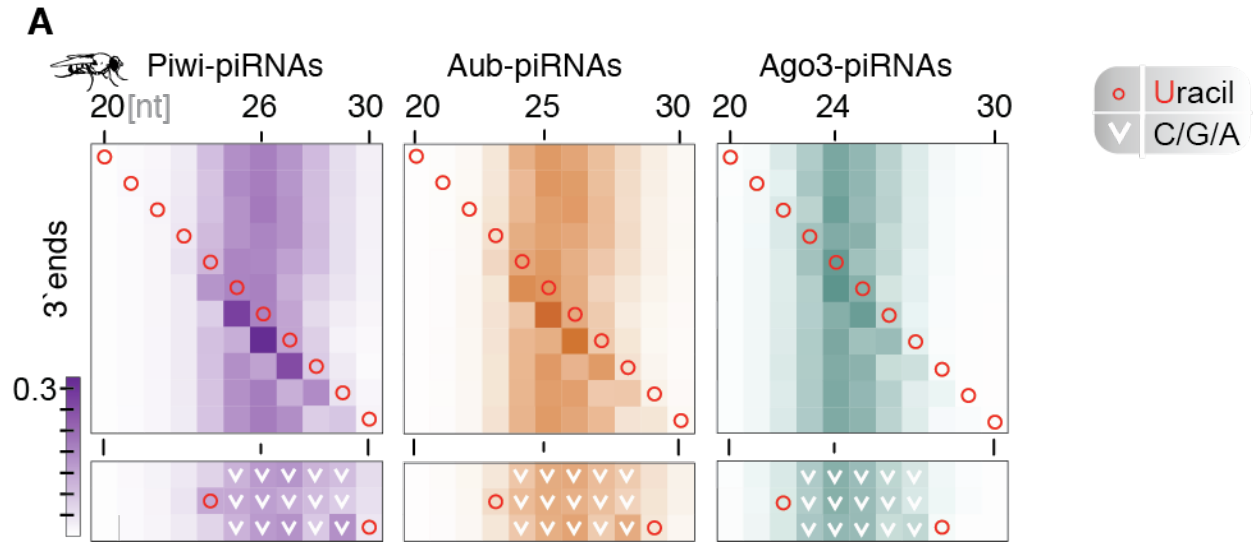

**Figure S3. The presence of Uridines (U) affects the position of 3'ends only within an optimal distance from the piRNA 5'end, related to Figure 4. (A)** In fly ovary piRNAs, the 3'-end is defined by the location of Uridine within a narrow window located at a fixed distance from the 5'-end. Rows depict distribution of 3'-ends for piRNAs where a Uridine (red circle) or absence of Uridine (V) is present at a certain distance from the 5'-end.

**Data S1.**  
**Supplemental Code**  
**related to Figures 1-4**  
**Stoyko et al.**

([https://github.com/HaaseLab/piRNA\\_ThreePrimeEnds](https://github.com/HaaseLab/piRNA_ThreePrimeEnds))

# Diversity of piRNA 3'ends

methods by: Daniel Stoyko & Pavol Genzor

12/06/2021

*Daniel Stoyko, Pavol Genzor, Astrid D. Haase*

This vignette describes the computational materials & methods associated with this manuscript. Please visit [HaaseLab/piRNA\\_ThreePrimeEnds github repository](#) to download functions used in the various scripts and analyses. Please refer to the GEO data set **GSE156058** associated with this study for adapter sequences and raw data. The analysis in this vignette was not performed with full data sets, but only subset of the data to demonstrate the materials and methods.

## About small RNA Libraries.

Small RNA libraries were prepared and pre-processed as described in Genzor et.al., 2021. Please refer to the corresponding github page for more information.

## Pre-requisites & Notes

\* Acquire the raw sequencing data from your facility or GEO at NCBI \* NOTE: some images may not have rendered perfectly

## Vignette Content

1. Figure1: Contribution of piRNA three prime ends - End Dominance
2. Figure2: Size distribution of major and minor ends of piRNAs
3. Figure3: Major and minor -dependent nucleotide frequencies of piRNAs
4. Figure4: Correlation of 3' end with nucleotide context

## Environment setup & test data preparation

Prepare your R working environment by ensuring you have all necessary packages installed and loaded. Download the *.RData* object from *github* to be and load it into R before proceeding.

```
# load libraries
suppressWarnings(
  suppressPackageStartupMessages({library("data.table"); library("dplyr");
  library("ggplot2"); library("ggpubr"); library("GenomicRanges");
  library("ggseqlogo"); library("BSgenome.Dmelanogaster.UCSC.dm6");
  library("stringr"); library("parallel")}))
```

## Load filtered subset of the data

```
SESSION.DIR="/Users/genzorp/Documents/GITHUB/piThreePrime/sessions/"
load(file = paste0(SESSION.DIR,"single_filtered_brep_1M.RData"))
```

Figure 1: Contribution of piRNA three prime ends

```
## Data
GR <- original.GR

## Make a table of uniquely mapping piRNAs

uniq.DT <- as.data.table(GR[mcols(GR)[["NH"]] %in% 1])

## Create a column with 5'-end coordinates
# NOTE: "start" refers to the 5'-end on the "+" strand and
# NOTE: "end" refers to 5'-end on "-" strand

uniq.DT[,FivePrime := paste0(seqnames, "_", ifelse(strand == "-", end, start), "_", strand)]

## Randomly assign each piRNA a value between 1 and N
## :- N is the number of unique sequences sharing the 5'-end without repeating
## :- This random value will be used to break ties between equally abundant 3'-ends
## :- sample() randomly assigns numbers within particular range

uniq.DT[,TieBreaker := base::sample(x = nrow(.SD), size = nrow(.SD), replace = F),
  by = FivePrime)]

## Define the Major End as the most abundant sequence per 5'-end
## :- use TieBreaker value to solve ties in abundance

uniq.DT <- uniq.DT[order(-MULT, TieBreaker)]
uniq.DT[,EndOrder := c(1:nrow(.SD)), by=FivePrime]
uniq.DT[,EndClass := ifelse(EndOrder > 1, "MinorEnds","MajorEnd")]
uniq.DT[["EndClass"]] <- factor(x = uniq.DT[["EndClass"]], levels = c("MinorEnds","MajorEnd"))

## Group 5'-ends into custom bins based on their abundance
## :- NOTE: the abundance is not normalized here

# summarize abundance
uniq.DT <- setDT(uniq.DT)
uniq.DT[,FivePrimeAbund := sum(MULT), by=FivePrime]

# find bins
aBreaks <- c(1,2,3,4,5,10,50,100,500,1000)
uniq.DT[["aBin"]] <- findInterval(x = uniq.DT[["FivePrimeAbund"]],
  vec = aBreaks, left.open = TRUE)

# add and organize bin name
uniq.DT <- setDT(uniq.DT)
uniq.DT[, "binName" := paste0(unique(c(min(FivePrimeAbund),max(FivePrimeAbund))),
  collapse = "-") , by = aBin]
uniq.DT[FivePrimeAbund > 1000][["binName"]] <- ">1000"
```

```
# order bin names
unique(unique.DT[["binName"]])
```

```
## [1] ">1000" "501-990" "101-500" "51-100" "11-50" "6-10" "5"
## [8] "4" "3" "2" "1"
```

```
binNameOrder <- c("1","2","3","4","5","6-10","11-50","51-100","101-500","501-999",>1000")
unique.DT[["aBin"]] <- factor(unique.DT[["aBin"]])
unique.DT[["binName"]] <- factor(x = unique.DT[["binName"]], levels = binNameOrder)
```

```
## Calculate contribution of the Major 3'-end to all the ends
```

```
unique.DT <- setDT(unique.DT)
unique.DT[,EndContribution := MULT/sum(MULT), by=FivePrime]
```

```
## View the generated table
```

```
unique.DT[FivePrime %in% "chr2L_3107310_-"]
```

```
##      seqnames      start      end width strand N NH MULT      FivePrime TieBreaker
## 1:   chr2L 3107284 3107310    27    - 3  1  27 chr2L_3107310_-      5
## 2:   chr2L 3107289 3107310    22    - 3  1   3 chr2L_3107310_-      1
## 3:   chr2L 3107293 3107310    18    - 2  1   2 chr2L_3107310_-      7
## 4:   chr2L 3107290 3107310    21    - 1  1   1 chr2L_3107310_-      2
## 5:   chr2L 3107285 3107310    26    - 1  1   1 chr2L_3107310_-      3
## 6:   chr2L 3107286 3107310    25    - 1  1   1 chr2L_3107310_-      4
## 7:   chr2L 3107288 3107310    23    - 1  1   1 chr2L_3107310_-      6
## 8:   chr2L 3107283 3107310    28    - 1  1   1 chr2L_3107310_-      8
##      EndOrder EndClass FivePrimeAbund aBin binName EndContribution
## 1:         1 MajorEnd           37    6 11-50      0.72972973
## 2:         2 MinorEnds          37    6 11-50      0.08108108
## 3:         3 MinorEnds          37    6 11-50      0.05405405
## 4:         4 MinorEnds          37    6 11-50      0.02702703
## 5:         5 MinorEnds          37    6 11-50      0.02702703
## 6:         6 MinorEnds          37    6 11-50      0.02702703
## 7:         7 MinorEnds          37    6 11-50      0.02702703
## 8:         8 MinorEnds          37    6 11-50      0.02702703
```

```
## Prepare data for visualization
```

```
Barplot.DT <- unique.DT[, .(Sum_Abundance = sum(MULT)), by=c("EndClass","aBin","binName")]
Barplot.DT
```

```
##      EndClass aBin binName Sum_Abundance
## 1: MajorEnd   10 >1000      381870
## 2: MinorEnds  10 >1000      247899
## 3: MajorEnd   9  <NA>       81875
## 4: MajorEnd   8 101-500     194990
## 5: MinorEnds  9  <NA>       49459
## 6: MinorEnds  8 101-500     111306
## 7: MajorEnd   7  51-100     114528
## 8: MajorEnd   6  11-50      349854
## 9: MinorEnds  7  51-100      59529
## 10: MinorEnds 6  11-50      149928
## 11: MajorEnd  5  6-10       212093
```



```
## 12: MajorEnd 4 5 78938
## 13: MinorEnds 5 6-10 61081
## 14: MajorEnd 3 4 112682
## 15: MajorEnd 2 3 247555
## 16: MajorEnd 1 2 327858
## 17: MinorEnds 4 5 15932
## 18: MinorEnds 3 4 15770
## 19: MajorEnd 0 1 177097
## 20: MinorEnds 2 3 9194
## 21: MinorEnds 1 2 4202
## EndClass aBin binName Sum_Abundance
```

```
NumberOfEnds.DT <- uniq.DT[, .N, by=c("FivePrime", "aBin", "binName")]
NumberOfEnds.DT
```

```
##           FivePrime aBin binName  N
## 1: chr2L_16698758_+  10 >1000 10
## 2: chr2L_16697936_+  10 >1000  9
## 3: chr2L_7425853_+  10 >1000  7
## 4: chr2L_7425979_+  10 >1000  9
## 5: chr2L_16698418_+  10 >1000  7
## ---
## 546175: chr2R_7522774_-  0 1 1
## 546176: chr2R_7522843_-  0 1 1
## 546177: chr2R_7522842_-  0 1 1
## 546178: chr2R_7522898_-  0 1 1
## 546179: chr2R_7523220_-  0 1 1
```

```
MeanNumberOfEnds.DT <- NumberOfEnds.DT[, lapply(.SD, mean), by=c("aBin", "binName"), .SDcols="N"]
MeanNumberOfEnds.DT
```

```
## aBin binName N
## 1: 10 >1000 8.812500
## 2: 9 <NA> 7.797872
## 3: 8 101-500 5.689873
## 4: 7 51-100 4.194179
## 5: 6 11-50 2.594930
## 6: 5 6-10 1.775432
## 7: 4 5 1.506377
## 8: 3 4 1.338025
## 9: 2 3 1.107428
## 10: 1 2 1.025309
## 11: 0 1 1.000000
```

```
## NOTE: Using the three tables generated in previous chunk
```

```
# Barplot.DT
```

```
# NumberOfEnds.DT
```

```
# MeanNumberOfEnds.DT
```

```
##
```

```
EndContributionPlot <- ggplot() + theme_pubclean() +
  geom_bar(data = Barplot.DT,
    aes(x = binName, y = Sum_Abundance, alpha = EndClass, group = EndClass),
```

```

stat = "identity", position = "fill", fill="#B37FC7",
width = 0.8) +
geom_boxplot(data = uniq.DT[EndClass %in% "MajorEnd"],
aes(x = binName, y= EndContribution),
outlier.shape = NA, width = 0.5, fill = NA) +
ylab("Fraction of dominant 3`ends") + xlab("") + coord_flip() +
scale_alpha_manual(values=c(0.1,0.8)) +
theme(legend.position="bottom",
axis.text = element_text(family = "Helvetica",colour = "black", size = 10),
aspect.ratio=0.75); EndContributionPlot

```

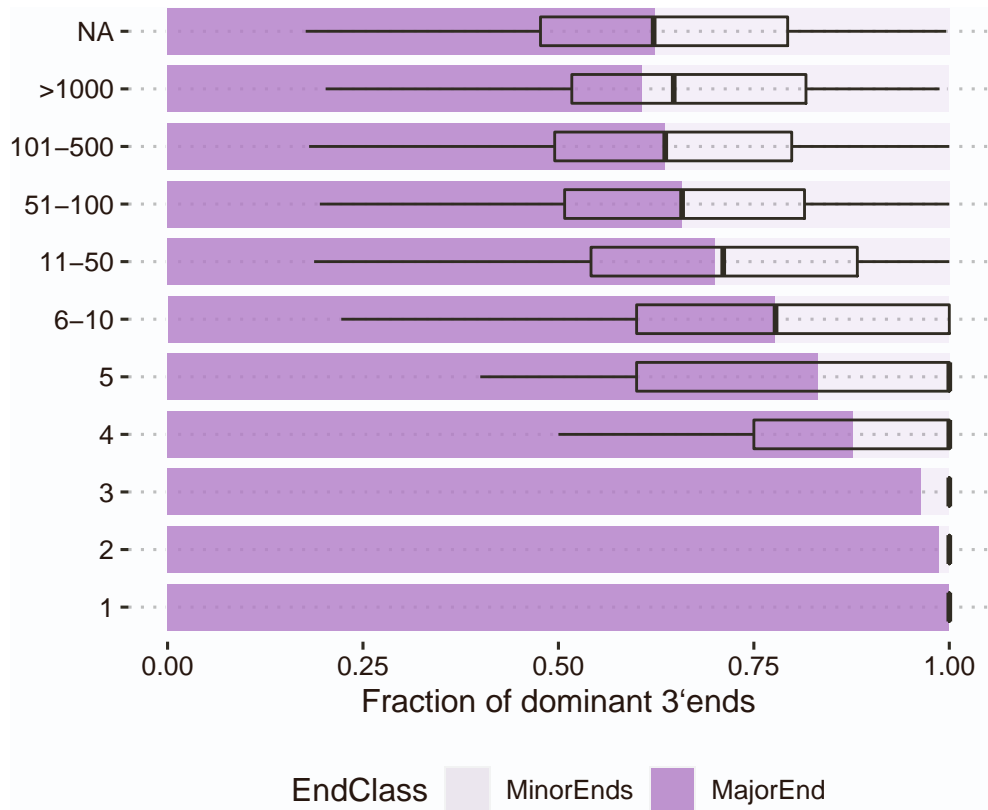

```

##
NumberOfEndsPlot <- ggplot() + theme_pubclean() +
geom_boxplot(data = NumberOfEnds.DT,
aes(x = binName, y = N),
color="black", fill="#C49CD3",
outlier.shape = NA) +
geom_point(data = MeanNumberOfEnds.DT,
aes(x= binName, y = N),
shape = 16, color = "firebrick3", size = 6) +
ylab("number of unique 3`ends") + xlab("") +
ggtitle(paste0("red = mean")) + coord_flip() +
theme(aspect.ratio = 0.75,
axis.text = element_text(family = "Helvetica",colour = "black", size = 10),
legend.position = "none"); NumberOfEndsPlot

```

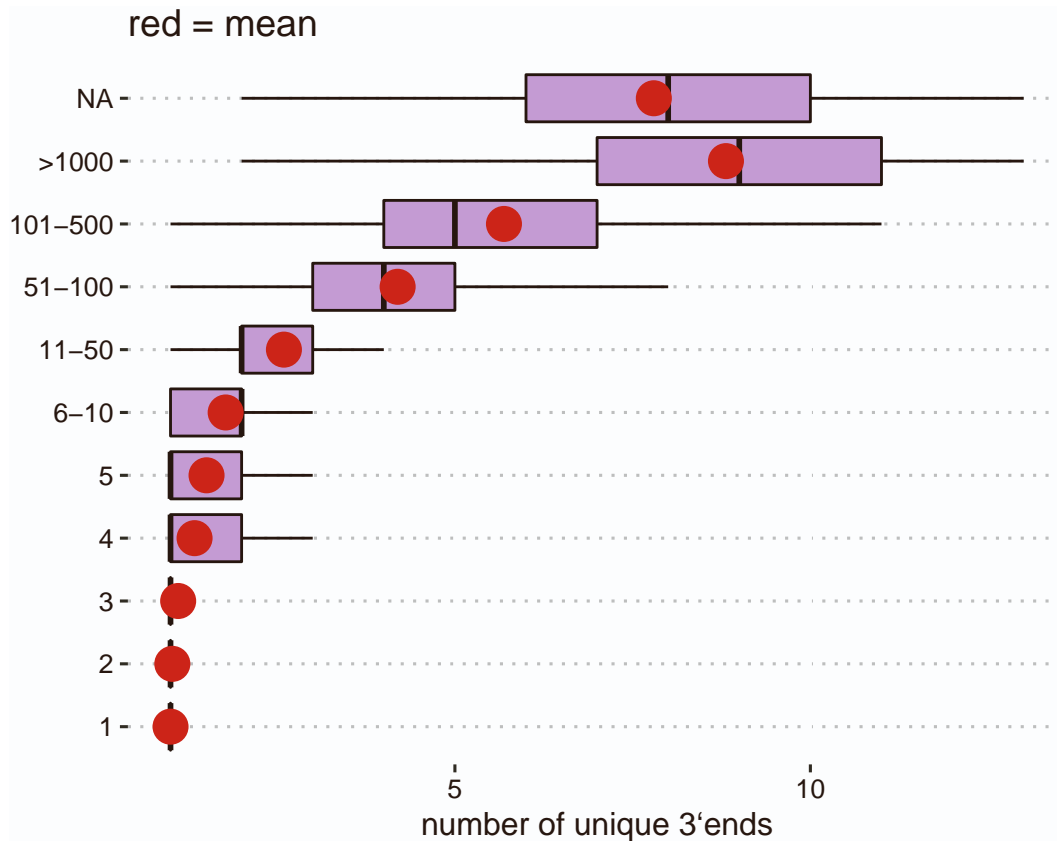

Figure 2: Size distribution of major and minor ends of piRNAs

```
## NOTE: Use that table generated in the previous chunk
##   uniq.DT

## Table by end type
MajorMinorLengths.DT <- uniq.DT[,lapply(.SD,sum), by=c("EndClass","width"), .SDcols="MULT"]
MajorMinorLengths.DT <- MajorMinorLengths.DT[order(EndClass,width)]
MajorMinorLengths.DT[,"groupReadSum" := sum(.SD),by="EndClass", .SDcols="MULT"]
MajorMinorLengths.DT[,"totalReads" := sum(.SD), .SDcols="MULT"]
MajorMinorLengths.DT[,"groupPercent" := (MULT/groupReadSum)*100]
MajorMinorLengths.DT[,"totalPercent" := (MULT/totalReads)*100]
MajorMinorLengths.DT
```

| ## | EndClass      | width | MULT   | groupReadSum | totalReads | groupPercent | totalPercent |
|----|---------------|-------|--------|--------------|------------|--------------|--------------|
| ## | 1: MinorEnds  | 18    | 14295  | 724300       | 3003640    | 1.973630e+00 | 4.759225e-01 |
| ## | 2: MinorEnds  | 19    | 17585  | 724300       | 3003640    | 2.427861e+00 | 5.854563e-01 |
| ## | 3: MinorEnds  | 20    | 29861  | 724300       | 3003640    | 4.122739e+00 | 9.941604e-01 |
| ## | 4: MinorEnds  | 21    | 58641  | 724300       | 3003640    | 8.096231e+00 | 1.952331e+00 |
| ## | 5: MinorEnds  | 22    | 83027  | 724300       | 3003640    | 1.146307e+01 | 2.764213e+00 |
| ## | 6: MinorEnds  | 23    | 48168  | 724300       | 3003640    | 6.650283e+00 | 1.603654e+00 |
| ## | 7: MinorEnds  | 24    | 116744 | 724300       | 3003640    | 1.611818e+01 | 3.886751e+00 |
| ## | 8: MinorEnds  | 25    | 123195 | 724300       | 3003640    | 1.700884e+01 | 4.101523e+00 |
| ## | 9: MinorEnds  | 26    | 116621 | 724300       | 3003640    | 1.610120e+01 | 3.882656e+00 |
| ## | 10: MinorEnds | 27    | 99043  | 724300       | 3003640    | 1.367431e+01 | 3.297432e+00 |
| ## | 11: MinorEnds | 28    | 16153  | 724300       | 3003640    | 2.230153e+00 | 5.377808e-01 |

```

## 12: MinorEnds    29    857      724300    3003640 1.183211e-01 2.853205e-02
## 13: MinorEnds    30     90      724300    3003640 1.242579e-02 2.996364e-03
## 14: MinorEnds    31     17      724300    3003640 2.347094e-03 5.659799e-04
## 15: MinorEnds    32      3      724300    3003640 4.141930e-04 9.987881e-05
## 16: MajorEnd     18  40386    2279340    3003640 1.771829e+00 1.344569e+00
## 17: MajorEnd     19  32049    2279340    3003640 1.406065e+00 1.067005e+00
## 18: MajorEnd     20  28716    2279340    3003640 1.259838e+00 9.560400e-01
## 19: MajorEnd     21  67803    2279340    3003640 2.974677e+00 2.257361e+00
## 20: MajorEnd     22  77983    2279340    3003640 3.421297e+00 2.596283e+00
## 21: MajorEnd     23 118871    2279340    3003640 5.215150e+00 3.957565e+00
## 22: MajorEnd     24 305666    2279340    3003640 1.341029e+01 1.017652e+01
## 23: MajorEnd     25 720392    2279340    3003640 3.160529e+01 2.398397e+01
## 24: MajorEnd     26 674169    2279340    3003640 2.957738e+01 2.244507e+01
## 25: MajorEnd     27 196817    2279340    3003640 8.634824e+00 6.552616e+00
## 26: MajorEnd     28  15607    2279340    3003640 6.847158e-01 5.196029e-01
## 27: MajorEnd     29   738     2279340    3003640 3.237779e-02 2.457019e-02
## 28: MajorEnd     30   88     2279340    3003640 3.860767e-03 2.929779e-03
## 29: MajorEnd     31   47     2279340    3003640 2.062000e-03 1.564768e-03
## 30: MajorEnd     32    8     2279340    3003640 3.509788e-04 2.663435e-04
##      EndClass width    MULT groupReadSum totalReads groupPercent totalPercent

```

```
## All reads
```

```

AllLengths.DT <- uniq.DT[,.(MULT = sum(.SD)), by=c("width"), .SDcols="MULT"]
AllLengths.DT[,"totalReads" := sum(.SD), .SDcols = "MULT"]
AllLengths.DT[,"totalPercent" := (MULT/totalReads)*100]
AllLengths.DT

```

```

##      width    MULT totalReads totalPercent
## 1:     23 167039    3003640 5.561219e+00
## 2:     22 161010    3003640 5.360496e+00
## 3:     24 422410    3003640 1.406327e+01
## 4:     21 126444    3003640 4.209692e+00
## 5:     25 843587    3003640 2.808549e+01
## 6:     26 790790    3003640 2.632772e+01
## 7:     20 58577     3003640 1.950200e+00
## 8:     27 295860    3003640 9.850049e+00
## 9:     19 49634     3003640 1.652462e+00
## 10:    18 54681     3003640 1.820491e+00
## 11:    28 31760     3003640 1.057384e+00
## 12:    29  1595     3003640 5.310224e-02
## 13:    30   178     3003640 5.926143e-03
## 14:    31    64     3003640 2.130748e-03
## 15:    32    11     3003640 3.662223e-04

```

```
## Plot
```

```

LengthDistributionPlot <- ggplot() + theme_pubclean() +
  geom_bar(data = AllLengths.DT,
           aes(x=width, y=totalPercent),
           stat="identity", fill="gray80", width = 0.8) +
  geom_line(data = MajorMinorLengths.DT,
           aes(x = width, y = groupPercent, colour = EndClass),
           size = 1) +
  geom_point(data = MajorMinorLengths.DT,

```

```

aes(x = width, y = groupPercent, shape = EndClass, colour = EndClass),
size = 4) +
xlab("size (nt)") + ylab("percent of piRNAs") +
scale_x_continuous(breaks = seq(0,40,2)) +
scale_y_continuous(breaks = seq(0,40,5)) +
scale_colour_manual(values = c("#AB72C0", "#FF6D33")) +
theme(aspect.ratio = 1, legend.position = "top",
axis.text = element_text(family = "Helvetica", colour = "black", size = 10))
LengthDistributionPlot

```

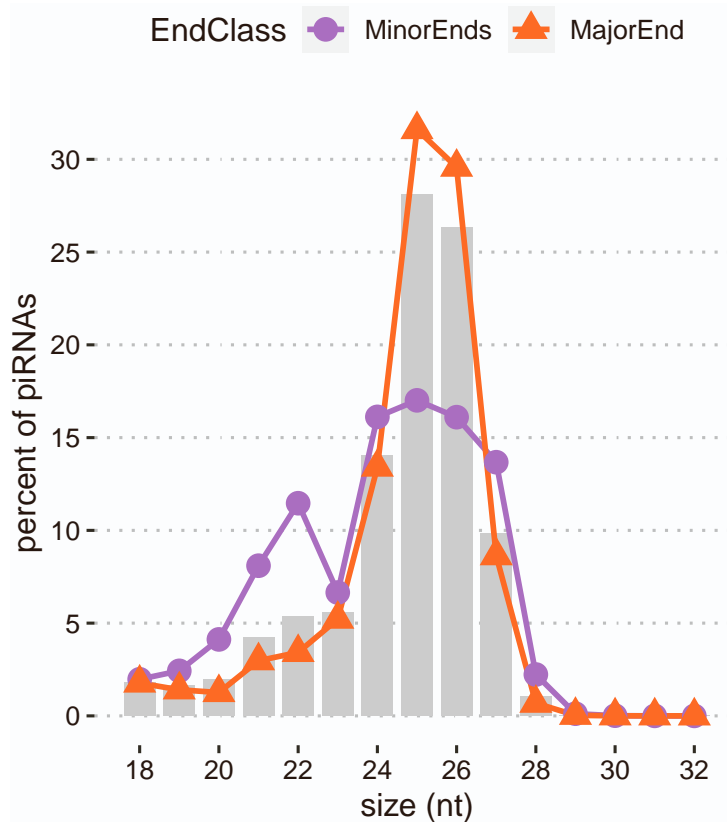

Figure S2: Distance between major ends in WT and PNLDC KO

```

## NOTE: Scripts used for comparing mouse WT to PNLDC KO piRNA major ends
## NOTE: Sample data is not provided. Data can be obtained from PRJNA421205
## See methods for details

## Set GR1 as the WT library
## Set GR2 as the PNLDC1 KO library

GR1 <- MOUSE.BAM.GR.WT
GR2 <- MOUSE.BAM.GR.KO

## For GR1, determine the major 3'-end in same manner as described previously
uniq.DT1 <- as.data.table(GR1[mcols(GR1)[["NH"]] %in% 1])
uniq.DT1[,FivePrime1 := paste0(seqnames, "_", ifelse(strand == "-", end, start), "_", strand)]

```

```

uniq.DT1[,TieBreaker := base::sample(x = nrow(.SD), size = nrow(.SD), replace = F),
      by = FivePrime1]
uniq.DT1 <- uniq.DT1[order(-MULT, TieBreaker)]
uniq.DT1[,EndOrder := c(1:nrow(.SD)), by=FivePrime1]
uniq.DT1[,EndClass := ifelse(EndOrder > 1, "MinorEnds","MajorEnd")]

## keep only major 3'-ends
uniq.DT1.maj <- uniq.DT1[EndClass %in% c("MajorEnd")]

## Determine 3'-end coordinate and discard unnecessary columns
uniq.DT1.maj[,ThreePrime1 := ifelse(strand == "-", start, end)]
uniq.DT1.maj <- uniq.DT1.maj[,c(5, 7, 8, 12)]
colnames(uniq.DT1.maj) <- c("strand1", "MULT1", "FivePrime1", "ThreePrime1")

uniq.DT1.maj

## Repeat for GR2
uniq.DT2 <- as.data.table(GR2[mcols(GR2)[["NH"]] %in% 1])
uniq.DT2[,FivePrime2 := paste0(seqnames, "_", ifelse(strand == "-", end, start), "_", strand)]
uniq.DT2[,TieBreaker := base::sample(x = nrow(.SD), size = nrow(.SD), replace = F),
      by = FivePrime2]
uniq.DT2 <- uniq.DT2[order(-MULT, TieBreaker)]
uniq.DT2[,EndOrder := c(1:nrow(.SD)), by=FivePrime2]
uniq.DT2[,EndClass := ifelse(EndOrder > 1, "MinorEnds","MajorEnd")]
uniq.DT2.maj <- uniq.DT2[EndClass %in% c("MajorEnd")]
uniq.DT2.maj[,ThreePrime2 := ifelse(strand == "-", start, end)]
uniq.DT2.maj <- uniq.DT2.maj[,c(5, 7, 8, 12)]
colnames(uniq.DT2.maj) <- c("strand2", "MULT2", "FivePrime2", "ThreePrime2")

## Merge the two files by 5'-end coordinate
## Discard sequences with 5'-ends not present in both datasets
DT.combined <- merge(uniq.DT1.maj, uniq.DT2.maj, by.x="FivePrime1", by.y="FivePrime2", all.x=F, all.y =

## Calculate total abundance of piRNAs in a pair
DT.combined[, MULTtotal := MULT1 + MULT2]

## Determine distance between the two major 3'-ends
DT.combined[, Distance := ifelse(strand1 == "+", ThreePrime2-ThreePrime1, ThreePrime1-ThreePrime2)]

## Keep sequences where PNLDC KO piRNA is longer than the WT piRNA
DT.combined <- DT.combined[Distance > 0]

## Count number of reads for each distance
DT.combined.sum <- DT.combined[, lapply(.SD, sum), .SDcols="MULTtotal", by="Distance"]

## Convert to % of total
DT.combined.sum$MULTtotal <- (DT.combined.sum$MULTtotal/ sum(DT.combined.sum$MULTtotal))*100

## Plot
DistancePlot <- ggplot() + theme_bw() +
  geom_bar(data=DT.combined.sum,
    aes(x=Distance, y = MULTtotal),
    color= "black",

```

```

    stat="identity",
    width= 0.85) +
labs(title = "SampleData",
     x= "Distance between the major 3'ends in WT and PNLDC KO",
     y= "% of total") +
theme(panel.grid = element_blank(),
     aspect.ratio = 1)

```

Figure 3: Major and minor -dependent nucleotide frequencies of piRNAs

```

## Data
GR <- original.GR

## Use only uniquely mapping piRNAs
uniq.GR <- GR[mcols(GR)[["NH"]] %in% "1"]
uniq.DT <- as.data.table(uniq.GR)

## Expand the GR to include surrounding nucleotides
uniq.GRE <- uniq.GR
end(uniq.GRE) <- end(uniq.GRE) + 4
start(uniq.GRE) <- start(uniq.GRE) - 4

## Add sequence to the table
uniq.DT[["seq"]] <- as.vector(getSeq(BSgenome.Dmelanogaster.UCSC.dm6, uniq.GRE))

## Create a column with 5'-end coordinates
uniq.DT <- setDT(uniq.DT)
uniq.DT[,FivePrime := paste0(seqnames, "_", ifelse(strand == "-", end, start), "_", strand)]

## Randomly assign each piRNA a value between 1 and N
uniq.DT[,TieBreaker := sample(nrow(.SD), size = nrow(.SD), replace = F), by = FivePrime]

## Define the Major End as the most abundant sequence per 5'-end
uniq.DT <- uniq.DT[order(-MULT, TieBreaker)]
uniq.DT[,EndOrder := c(1:nrow(.SD)), by=FivePrime]
uniq.DT[,EndClass := ifelse(EndOrder > 1, "MinorEnds","MajorEnd")]
uniq.DT[["EndClass"]] <- factor(x = uniq.DT[["EndClass"]], levels = c("MinorEnds","MajorEnd"))

## Group 5'-ends into custom bins based on their abundance
uniq.DT <- setDT(uniq.DT)
uniq.DT[,FivePrimeAbund := sum(MULT), by=FivePrime]
uniq.DT

```

```

##      seqnames      start      end width strand N NH  MULT
##    1:  chr2L 16698758 16698780    23    + 3  1 28686
##    2:  chr2L 16697936 16697957    22    + 3  1 27064
##    3:  chr2L 16698758 16698779    22    + 3  1 26662
##    4:  chr2L  7425853  7425875    23    + 3  1 24812
##    5:  chr2L  7425979  7426002    24    + 3  1 23638
##    ---
## 666754:  chr2L 19467210 19467238    29    + 1  1    1
## 666755:  chr2L 19467405 19467432    28    + 1  1    1

```

```

## 666756: chr2R 5050923 5050953 31 + 1 1 1
## 666757: chr2R 5055725 5055744 20 + 1 1 1
## 666758: chr2R 5055342 5055370 29 + 1 1 1
##
## seq FivePrime TieBreaker
## 1: TTGCTCTTTGGTGATTTAGCTGTATGGTGT chr2L_16698758_+ 7
## 2: TGTTTCTTTGGTATTCTAGCTGTAGATTGT chr2L_16697936_+ 9
## 3: TTGCTCTTTGGTGATTTAGCTGTATGGTGT chr2L_16698758_+ 6
## 4: ACAGTCAGGTACCTGAAGTAGCGCGGTGGT chr2L_7425853_+ 2
## 5: GTCTATTGTACTTCATCAGGTGCTCTGGTGTG chr2L_7425979_+ 7
## ---
## 666754: ACGCTTATTTGTTGATTAGTTCTAGCCTTAGTTTCCC chr2L_19467210_+ 10
## 666755: AAGTTAAACACCCGAAGCTGGAAGAACCGATGTAT chr2L_19467405_+ 10
## 666756: CAACTTACGCATATGTGAGTGGGGAAAGGACTCGGACAG chr2R_5050923_+ 10
## 666757: AATTTGTTTCGTCACAGTATGCAATATT chr2R_5055725_+ 10
## 666758: TAAATCTTGATTTGCGGTGCTTCCACCTGCAAACCTCT chr2R_5055342_+ 11
## EndOrder EndClass FivePrimeAbund
## 1: 1 MajorEnd 67950
## 2: 1 MajorEnd 41154
## 3: 2 MinorEnds 67950
## 4: 1 MajorEnd 46882
## 5: 1 MajorEnd 53587
## ---
## 666754: 11 MinorEnds 384
## 666755: 10 MinorEnds 648
## 666756: 11 MinorEnds 840
## 666757: 10 MinorEnds 308
## 666758: 12 MinorEnds 1238

```

```

## View the generated table
uniq.DT[FivePrime %in% "chr2L_3107310_-"]

```

```

## seqnames start end width strand N NH MULT
## 1: chr2L 3107284 3107310 27 - 3 1 27
## 2: chr2L 3107289 3107310 22 - 3 1 3
## 3: chr2L 3107293 3107310 18 - 2 1 2
## 4: chr2L 3107290 3107310 21 - 1 1 1
## 5: chr2L 3107285 3107310 26 - 1 1 1
## 6: chr2L 3107283 3107310 28 - 1 1 1
## 7: chr2L 3107288 3107310 23 - 1 1 1
## 8: chr2L 3107286 3107310 25 - 1 1 1
## seq FivePrime TieBreaker EndOrder
## 1: CAACTCTCTCTGCGTCTCTCTATAGACCCGATTAC chr2L_3107310_- 7 1
## 2: CAACTCTCTCTGCGTCTCTCTATAGACCCG chr2L_3107310_- 5 2
## 3: CAACTCTCTCTGCGTCTCTCTATAGA chr2L_3107310_- 8 3
## 4: CAACTCTCTCTGCGTCTCTCTATAGACCC chr2L_3107310_- 1 4
## 5: CAACTCTCTCTGCGTCTCTCTATAGACCCGATTA chr2L_3107310_- 2 5
## 6: CAACTCTCTCTGCGTCTCTCTATAGACCCGATTACC chr2L_3107310_- 3 6
## 7: CAACTCTCTCTGCGTCTCTCTATAGACCCGA chr2L_3107310_- 4 7
## 8: CAACTCTCTCTGCGTCTCTCTATAGACCCGATT chr2L_3107310_- 6 8
## EndClass FivePrimeAbund
## 1: MajorEnd 37
## 2: MinorEnds 37
## 3: MinorEnds 37
## 4: MinorEnds 37

```



```
## 5: MinorEnds          37
## 6: MinorEnds          37
## 7: MinorEnds          37
## 8: MinorEnds          37
```

```
## Plotting LOGO
## 1. select type of end and its sequences
## 2. extract sub-string
## 3. expand to reads
## 4. replace nucleotides

ForLogo.second.DT <- uniq.DT[EndOrder %in% 2][,c("MULT", "seq")]
ForLogo.second.DT[,Seq_Range := substring(seq, nchar(seq)-8 ,nchar(seq))]
ForLogo.second.DT <- ForLogo.second.DT[ rep( c(1:nrow(ForLogo.second.DT)),
                                           times = MULT)]
ForLogo.second.DT[["Seq_Range"]] <- gsub("T","U",ForLogo.second.DT[["Seq_Range"]])

##
## Plot LOGO
##

LogoPlot <- ggplot() + theme_pubclean() +
  geom_logo(data=ForLogo.second.DT[["Seq_Range"]],
            method="bits", seq_type="rna") +
  scale_y_continuous(limits = c(0,1)) +
  scale_x_continuous(
    breaks = 1:9,
    labels = paste(c("n-4","n-3","n-2","n-1","n","+1","+2","+3","+4")) ) +
  theme(panel.grid = element_blank(),
        axis.text = element_text(family = "Helvetica", colour = "black", size = 10),
        aspect.ratio = 0.5); LogoPlot
```

```
## Warning: 'guides(<scale> = FALSE)' is deprecated. Please use 'guides(<scale> =
## "none")' instead.
```

```
## Scale for 'x' is already present. Adding another scale for 'x', which will
## replace the existing scale.
```

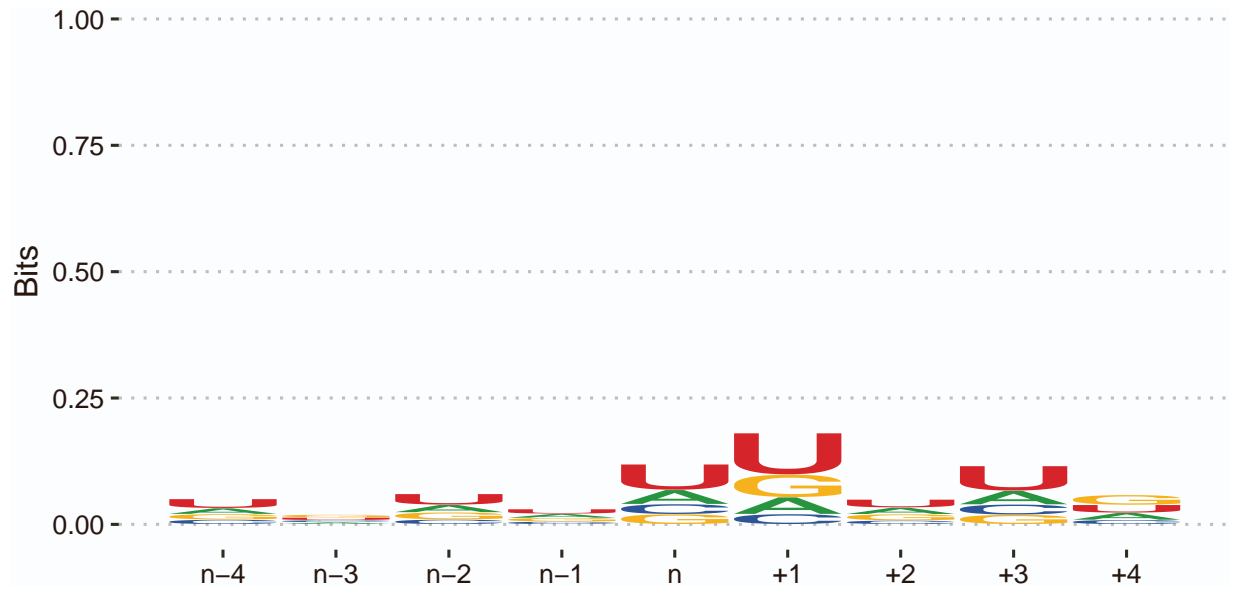

```
##
## Plot +1 nucleotide frequency
##

## For barplots with +1 nucleotide composition:
## isolate the +1 nucleotide

uniq.DT[, plusOne := substring(seq, nchar(seq)-3, nchar(seq)-3)]
PlusOneComposition.DT <- uniq.DT[, .(MULT = sum(MULT)), by=c("EndClass","plusOne")]
PlusOneComposition.DT[["plusOne"]] <- factor(PlusOneComposition.DT[["plusOne"]], c("A","G","C","T"))

## set colors
nuc_colors <- c("#00AF54", "#FFD639", "#447EC5", "#DF2935")

## plot
PlusOneCompositionPlot <- ggplot() + theme_pubclean()+
  geom_bar(data = PlusOneComposition.DT,
           aes(x = EndClass, y = MULT, fill = plusOne),
           stat="identity", position="fill", width = 0.8) +
  scale_fill_manual(values=nuc_colors) +
  ylab("fraction nucleotide") +
  theme(aspect.ratio = 2,
        legend.position = "right",
        axis.text = element_text(family = "Helvetica",colour = "black", size = 10),
        panel.grid = element_blank()); PlusOneCompositionPlot
```

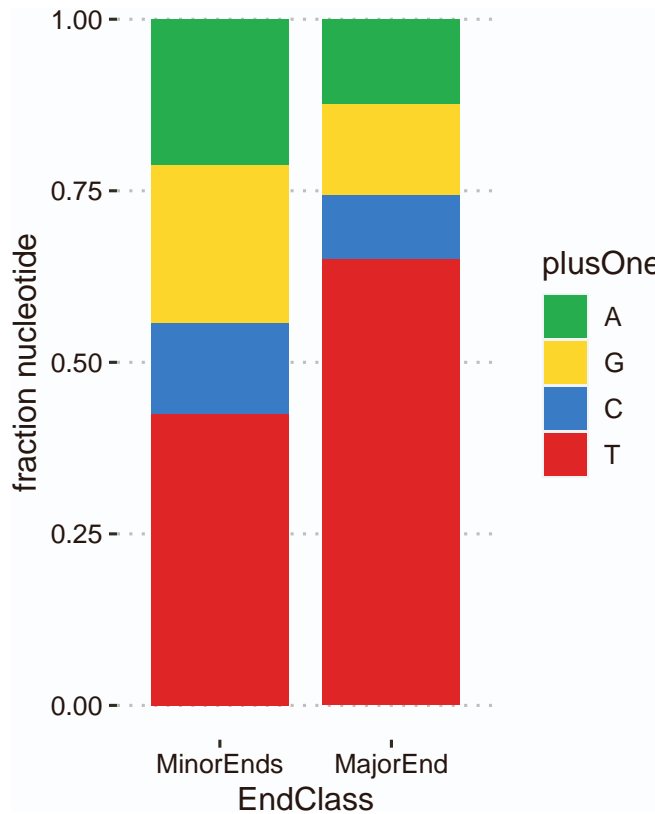

Figure 4 Heatmaps: Distribution of 3'-ends relative to 5'-ends

```
## Crate main objects

GR <- original.GR
uniq.GR <- GR[mcols(GR)[["NH"]] %in% 1]
uniq.DT <- as.data.table(uniq.GR)

## Extend the 3'-end of piRNAs so all piRNAs are 50-nt long & add sequence to the list

uniq.GRE <- uniq.GR
end(uniq.GRE[strand(uniq.GRE)=="+"]) <- start(uniq.GRE[strand(uniq.GRE)=="+"])+50
start(uniq.GRE[strand(uniq.GRE)=="-"]) <- end(uniq.GRE[strand(uniq.GRE)=="-"])-50
uniq.DT[["seq"]] <- as.vector(getSeq(BSgenome.Dmelanogaster.UCSC.dm6, uniq.GRE))

## Set analysis range, trim reads to this range & replace T's for U's
aRange <- c(18:32)
uniq.DT[,seq := substring(seq, min(aRange), max(aRange))]
uniq.DT[["seq"]] <- gsub("T", "U", uniq.DT[["seq"]])

## Create a vector of sequence contexts you wish to analyze. Must be same length as range above.
## Add any custom contexts you would like to use
## - shorthand symbols:
## N: U, C, G, or A
## V: C, G, or A (no U)
## i.e.: "NUNNNNNNNNNNNNNNN"
## This sequence will be used to select have a U 19-nt away from the 5'-end
```

```

aContexts <- unlist(lapply(c(0: (length(aRange)-1)), function(i){
  paste(c(rep("N", i), "U", rep("N", (length(aRange)-1)-i)), collapse=""))))
customContexts <- c("NNNNNNNNNNNNNNNN", "NNNNNNVVVVVVNNN", "NNNNNNVVVVVVUNN", "NNNNNUVVVVVVNNN")
aContexts <- c(aContexts, customContexts)

## Calculate size distribution for all piRNAs
## Make sure all lengths in the window of analysis are represented in the Distribution
## Normalize by converting to fraction / percentage of total

DistributionOfAll <- uniq.DT[, .(MULT = sum(MULT)), by="width"][order(width)]
if(any(!aRange %in% DistributionOfAll[["width"]])){
  DistributionOfAll <- bind_rows(DistributionOfAll,
    data.table(width = setdiff(aRange, DistributionOfAll[["width"]]),
      MULT = 0))}
DistributionOfAll[, "Percent" := (MULT/sum(MULT))*100]

## Determine the piRNA 3'-end distribution for each context

a_context <- aContexts[1]
Regex <- gsub("N", "[UCGA]", a_context)

## Loop through contexts
EndDistribution <- rbindlist(lapply(seq_along(aContexts), function(a){
  # Start and report progress
  message(paste0("a context: ", a))
  a_context <- aContexts[a]

  # Convert context to regex format and simplify
  a_regex_format <- gsub("N", "[UCGA]", a_context)
  a_regex_format <- gsub("V", "[CGA]", a_regex_format)

  # Find sequences which match the context and determine size distribution
  subset.DT <- uniq.DT[str_detect(seq, a_regex_format)][, .(MULT = sum(MULT)), by="width"]

  # Make sure all lengths in the total distribution are represented in the subset
  if(any(!DistributionOfAll[["width"]] %in% subset.DT[["width"]])){
    subset.DT <- bind_rows(subset.DT,
      data.table(width = setdiff(DistributionOfAll[["width"]],
        subset.DT[["width"]]), MULT = 0))}

  # Make sure all lengths in the window of analysis are represented in the subset
  if(any(!aRange %in% subset.DT[["width"]])){
    subset.DT <- bind_rows(subset.DT,
      data.table(width = setdiff(aRange,
        subset.DT[["width"]]), MULT = 0))}

  # order and normalize, and find deviation
  subset.DT <- subset.DT[order(width)]
  subset.DT[, "Percent" := (MULT/sum(MULT))*100]
  subset.DT[, "DeviationFromNormalDistribution" := Percent - DistributionOfAll[["Percent"]]]

```

```
# Add data identifiers
subset.DT[["ContextNumber"]] <- a
subset.DT[["Seq"]] <- strsplit(a_context, "")[[1]]
return(subset.DT }))
```

## a context: 1

## a context: 2

## a context: 3

## a context: 4

## a context: 5

## a context: 6

## a context: 7

## a context: 8

## a context: 9

## a context: 10

## a context: 11

## a context: 12

## a context: 13

## a context: 14

## a context: 15

## a context: 16

## a context: 17

## a context: 18

## a context: 19

EndDistribution

| ##      | width | MULT  | Percent     | DeviationFromNormalDistribution | ContextNumber | Seq |
|---------|-------|-------|-------------|---------------------------------|---------------|-----|
| ## 1:   | 18    | 18915 | 2.059815787 | 0.239324650                     | 1             | U   |
| ## 2:   | 19    | 18430 | 2.006999998 | 0.354538318                     | 1             | N   |
| ## 3:   | 20    | 13728 | 1.494959087 | -0.455241337                    | 1             | N   |
| ## 4:   | 21    | 24285 | 2.644600920 | -1.565091321                    | 1             | N   |
| ## 5:   | 22    | 45587 | 4.964357510 | -0.396138422                    | 1             | N   |
| ## ---  |       |       |             |                                 |               |     |
| ## 281: | 28    | 1112  | 1.932434311 | 0.875050603                     | 19            | V   |
| ## 282: | 29    | 89    | 0.154664257 | 0.101562021                     | 19            | V   |
| ## 283: | 30    | 10    | 0.017378006 | 0.011451863                     | 19            | N   |
| ## 284: | 31    | 3     | 0.005213402 | 0.003082654                     | 19            | N   |
| ## 285: | 32    | 1     | 0.001737801 | 0.001371578                     | 19            | N   |

```
## only show values within your window
EndDistribution <- EndDistribution[width %in% aRange]
```

```
##
## Plot heatmap of contexts
##

HeatmapPlot <- ggplot() + theme_bw() +
  geom_tile(data=EndDistribution,
            aes(x=width, y=ContextNumber, fill=Percent),
            color="white", size = 0.4) +
  geom_text(data=EndDistribution[Seq != "N"],
            aes(x=width, y= ContextNumber, label=Seq, size=4)) +
  scale_fill_gradient(low="white",high="maroon4",
                     limits=c(0, max(EndDistribution[["Percent"]])),
                     name = "% of 3'-ends") +
  xlab("Nucleotides downstream of 5'-end") +
  ylab("a piRNA nucleotide contexts") +
  scale_x_continuous(expand = c(0.000,0.0030)) +
  scale_size_continuous(guide="none") +
  scale_y_continuous(trans="reverse", breaks = NULL, expand = c(0,0)) +
  coord_equal() +
  theme(panel.background = element_blank(),
        panel.grid = element_blank(),
        legend.position = "top",
        axis.text.y=element_blank()); HeatmapPlot
```

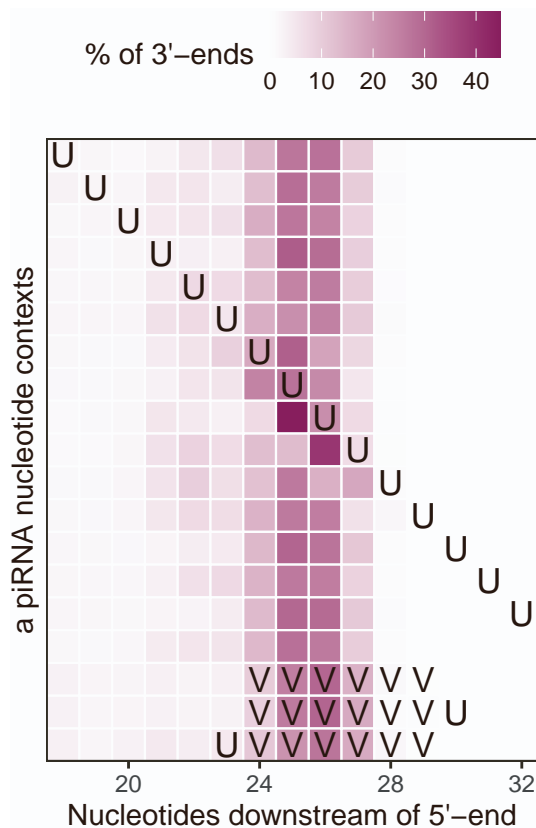

```
##
## Plot Heatmap Deviation
##

HeatmapDeviationPlot <- ggplot() + theme_bw() +
  geom_tile(data=EndDistribution,
            aes(x=width, y=ContextNumber, fill=DeviationFromNormalDistribution),
            color="white", size = 0.4) +
  geom_text(data=EndDistribution[Seq != "N"],
            aes(x=width, y= ContextNumber, label=Seq, size=4))+
  scale_fill_gradient2(low="navy", mid="white", high="firebrick4",
                       limits = c(min(EndDistribution[["DeviationFromNormalDistribution"]]),
                                   max(EndDistribution[["DeviationFromNormalDistribution"]])) +
  xlab("Nucleotides downstream of 5'-end") +
  ylab("a piRNA nucleotide contexts") +
  scale_x_continuous(expand = c(0.000,0.0030))+
  scale_size_continuous(guide= "none")+
  scale_y_continuous(trans="reverse", breaks = NULL, expand = c(0,0)) +
  coord_equal() +
  theme(panel.background = element_blank(),
        panel.grid = element_blank(),
        legend.position = "top",
        axis.text.y=element_blank()); HeatmapDeviationPlot
```

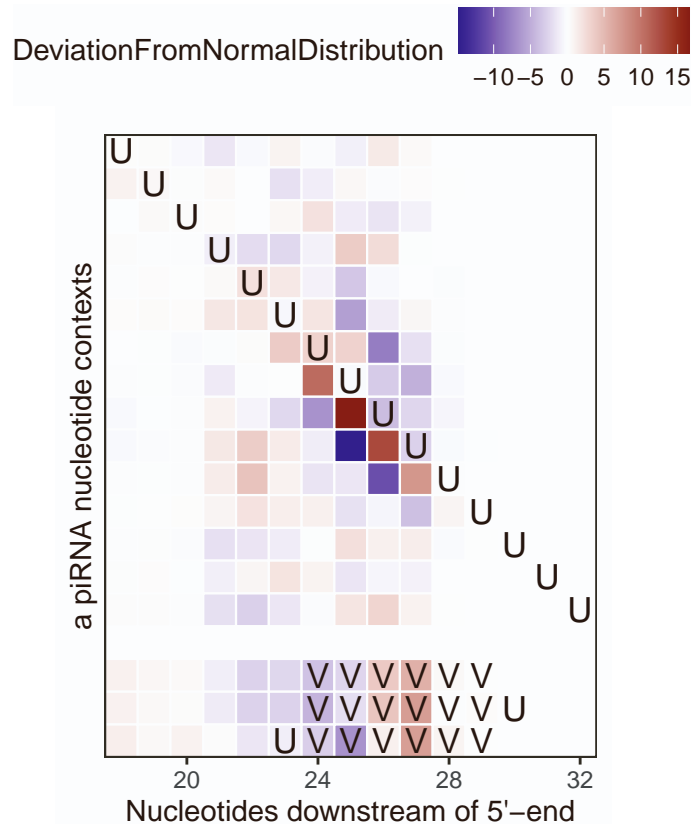

Figure 4 Z-score: Distribution of 3'-end relative to sequence context of interest

```
## Crate main objects

GR <- original.GR
uniq.GR <- GR[mcols(GR)[["NH"]] %in% 1]

## Extend both ends of piRNAs to see sequence immediately down- and up-stream

ExpandBy <- 60
end(uniq.GR) <- end(uniq.GR)+ExpandBy
start(uniq.GR) <- start(uniq.GR)-ExpandBy

## Make sure that the extended sequences are still within the boundaries of chromosomes
## Use the appropriate genome
RefGen <- BSgenome::getBSgenome("BSgenome.Dmelanogaster.UCSC.dm6")
RefGen <- GRanges(seqnames = names(RefGen),
                  ranges = IRanges(start = 1,
                                   end = GenomeInfoDb::seqlengths(RefGen)))
uniq.GR <- IRanges::subsetByOverlaps(uniq.GR, RefGen, type = "within")

## Convert to data.table and obtain sequence

uniq.DT <- as.data.table(uniq.GR)
uniq.DT[["seq"]] <- as.vector(getSeq(BSgenome.Dmelanogaster.UCSC.dm6, uniq.GR))

## Select the range of analysis, must be less than what the original sequence were expanded by (60)
```



```

Range <- 51

## Select sequence context to analyze
## Add any custom contexts you would like to use
## - use shorthands such as V = C, G, or A

Context <- "VVUVV"

## Make sequence context same length as the Range by adding N's
Context <- paste(c(paste(rep("N", floor((Range-nchar(Context))/2)), collapse=""), Context, paste(rep("N",
Context

```

```
## [1] "NNNNNNNNNNNNNNNNNNNNNNNNNNNNNNVVUVVNNNNNNNNNNNNNNNNNNNNNNNNNNNNNN"
```

```

## Convert Context to R regex format
Regex <- gsub("N", "[UCGA]", Context)
Regex <- gsub("V", "[CGA]", Regex)

## Convert to DNA
Regex <- gsub("U", "T", Regex)

## Create vector of positions for analysis
PosVector <- c(-((Range-1)/2):((Range-1)/2))

## Loop through the searching of the Context motif
## Use parallel package to speed up the Calculations
NumberOfCores <- 2

MotifSearch <- bind_rows(mclapply(seq_along(PosVector), function(a){

  Position <- PosVector[a]
  MaxWindow <- max(PosVector)

  ## Calculate total number of 3'-ends at (PosVector[a]) nucleotides away from center of context
  ThreePrimeSum <- sum(uniq.DT[str_detect(substring(seq,
                                                    (width-ExpandBy)-(a+MaxWindow),
                                                    (((width-ExpandBy)-(a+MaxWindow))+(Range-1))), Regex)]["MU

## prepare output
Output <- data.table(
  Position = Position,
  Nucleotide = substring(Context, a, a),
  ThreePrime = ThreePrimeSum
)

return(Output)
}, mc.cores = NumberOfCores))

MotifSearch[20:35]

```

```
##      Position Nucleotide ThreePrime
```

```
## 1:      -6      N      182832
## 2:      -5      N      185349
## 3:      -4      N      148123
## 4:      -3      N      132726
## 5:      -2      V      208009
## 6:      -1      V      206033
## 7:       0      U      131668
## 8:       1      V      133841
## 9:       2      V      174869
## 10:     3      N      203119
## 11:     4      N      165821
## 12:     5      N      174248
## 13:     6      N      165076
## 14:     7      N      187432
## 15:     8      N      174311
## 16:     9      N      168634
```

```
## Convert sum of 3'-ends at each position into a Z-score
```

```
MotifSearch[["Zscore"]] <- (MotifSearch[["ThreePrime"]] - mean(MotifSearch[["ThreePrime"]])) / sd(MotifSearch[["ThreePrime"]])
```

```
## Only depict central 21 nucleotides
```

```
MotifSearchGraph <- MotifSearch[Position %in% c(-10:10)]
```

```
## Organize data
```

```
MotifSearchGraph[["Position"]] <- factor(MotifSearchGraph[["Position"]])
```

```
## Plot the Z-score graph
```

```
ZscorePlot <- ggplot() + theme_pubclean() +
  geom_hline(yintercept = 0, linetype="dashed", color = "red", lwd = 0.3) +
  geom_line(data=MotifSearchGraph,
            aes(x=Position, y=Zscore, group = 1),
            color = "gray60", size = 1, linetype = "longdash") +
  geom_point(data=MotifSearchGraph,
             aes(x=Position, y=Zscore),
             shape=16, size=5, fill = "gray60", color = "black") +
  labs(y= "3'-ends (Z-score)", x="")+
  scale_x_discrete(labels = MotifSearchGraph[["Nucleotide"]]) +
  theme(aspect.ratio = 0.4);ZscorePlot
```

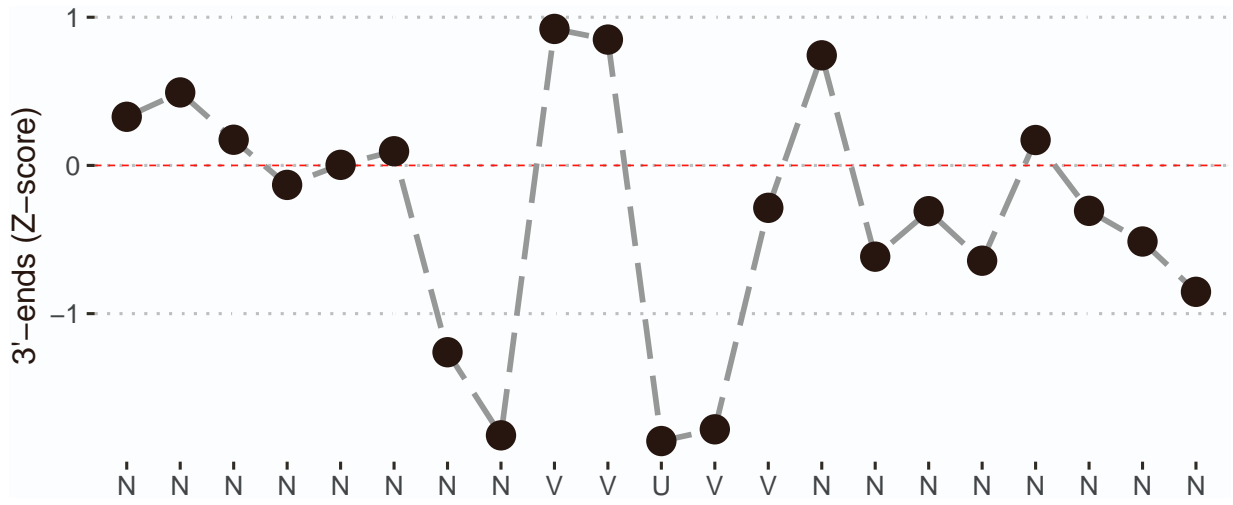

•  
•  
•

This concludes the methods.

THE END.
